# Supplementary material for: Carbon spheres with catalytic silver centres as selenium hosts for stable lithium–selenium batteries
Source: Royal Society of Chemistry journal article supplement (doi:10.1039/d3ya00487b), 2023-12-13
Supplement: d3ya00487b1.pdf [file d3ya00487b1.pdf]

## Supplementary Information

### Carbon Spheres with Catalytic Silver Centres as Selenium Host for Stable Lithium-Selenium Batteries

Jahnvi M. Sudharma,<sup>‡</sup> Sreelakshmy K. Jayaprakash,<sup>‡</sup> Shruti Suriyakumar,<sup>\*</sup> Bhargav

Rajbongshi, Manikoth M. Shaijumon<sup>\*</sup>

School of Physics, Indian Institute of Science Education and Research Thiruvananthapuram,  
Vithura, Thiruvananthapuram, Kerala 695551, India

\* Corresponding Authors: [shaiju@iisertvm.ac.in](mailto:shaiju@iisertvm.ac.in); [shruti@iisertvm.ac.in](mailto:shruti@iisertvm.ac.in)

<sup>‡</sup> These authors contributed equally to this work.

#### List of Figures and Tables

**Fig. S1.** (a) SEM image (b) TEM image and (c) UV-Visible spectrum of synthesised silver nanoparticles.

**Fig. S2.** Raman spectra of all the different compositions.

**Fig. S3.** Particle size distribution of (a) CS (b) Ag@CS and (c) Ag@CS/Se.

**Fig S4.** EDX spectra of the various cathode candidates and a table showing their composition in Wt% and At%.

**Fig S5.** XRD pattern of the silver centred carbon composite (a) before and (b) after selenium incorporation.

**Fig. S6.** Nitrogen adsorption/desorption isotherms of (a) CS, (b) Ag@CS and (c) Ag@CS/Se. Pore size distribution plot of (d) CS, (e) Ag@CS and (f) Ag@CS/Se.

**Fig S7.** Survey spectrum of Ag@CS/Se.

**Fig. S8.** (a) CVs recorded at 0.5 mV s<sup>-1</sup> scan rate, (b) galvanostatic cycling profiles obtained at varying current densities and (c) rate capability plot of CS electrode. (d) CVs recorded at 0.5 mV s<sup>-1</sup> scan rate, (e) galvanostatic cycling profiles obtained at varying current densities and (f) rate capability plot of CS@Ag electrode.

**Fig. S9.** (a,d) CVs recorded at 0.5 mV s<sup>-1</sup>, (b,e) galvanostatic cycling profiles obtained at varying C-rates and (c,f) rate capability plot of Li-Se cells with CS@Ag as host with 10% and 40% selenium loading, respectively.

**Fig. S10.** Nyquist plot of Li-Se cell with silver catalyst centre before cycling.

**Fig. S11.** SEM and EDX of Ag@CS/Se cathode (a) before and (b) after cycling.

**Table S1.** Comparison of the electrochemical performance of Se-based composite cathode presented in this work with those reported in the literature.

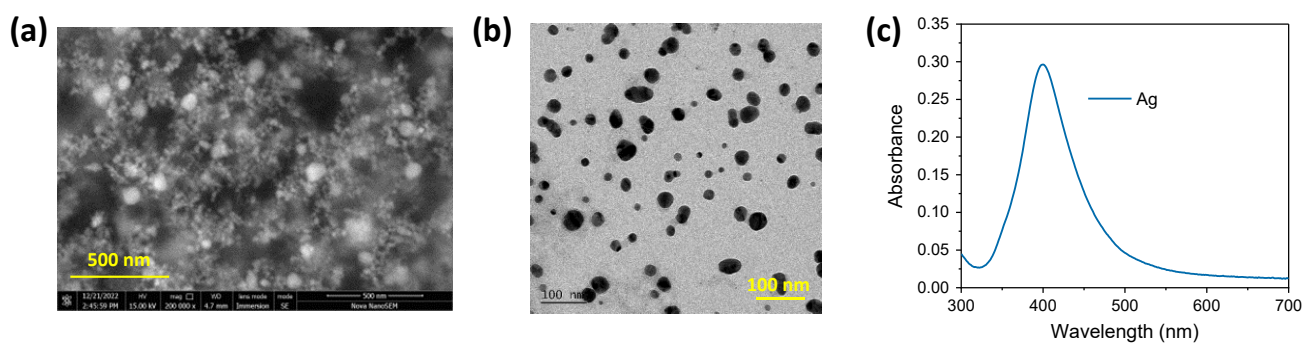

**Fig. S1.** (a) SEM image (b) TEM image and (c) UV-Visible spectrum of synthesised silver nanoparticles.

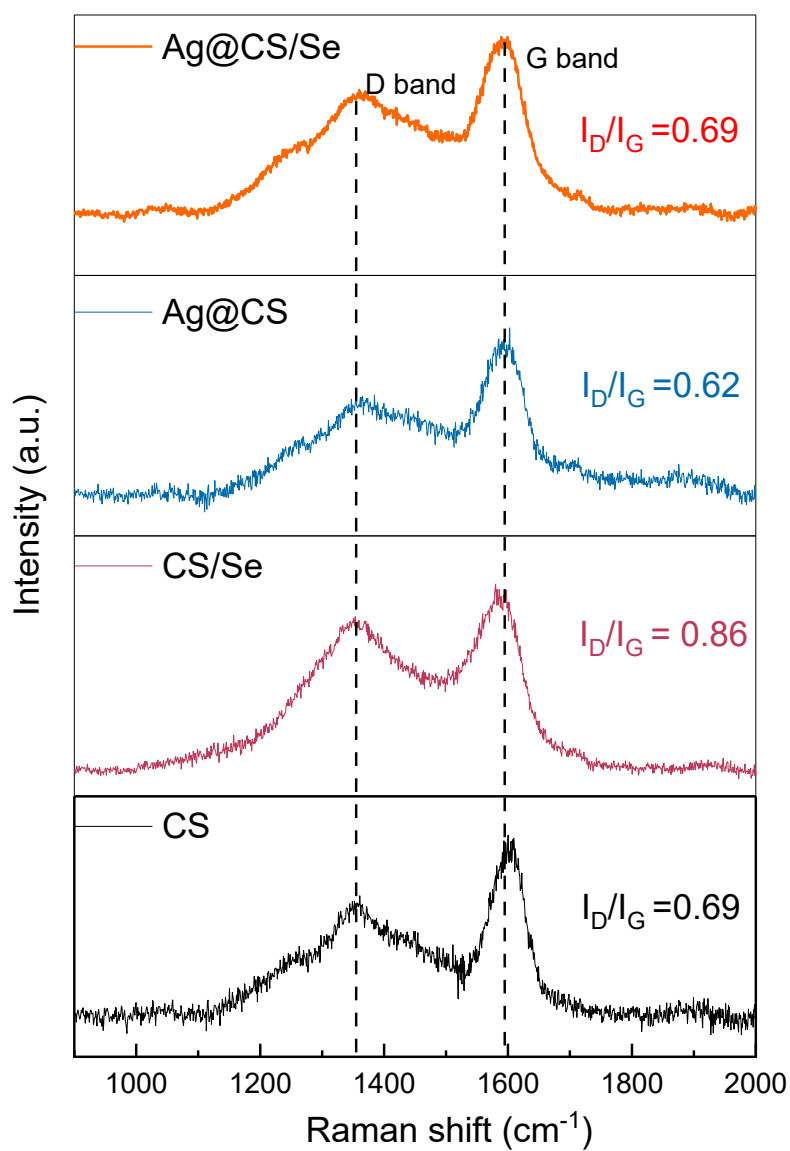

**Fig. S2.** Raman spectra of all the different compositions.

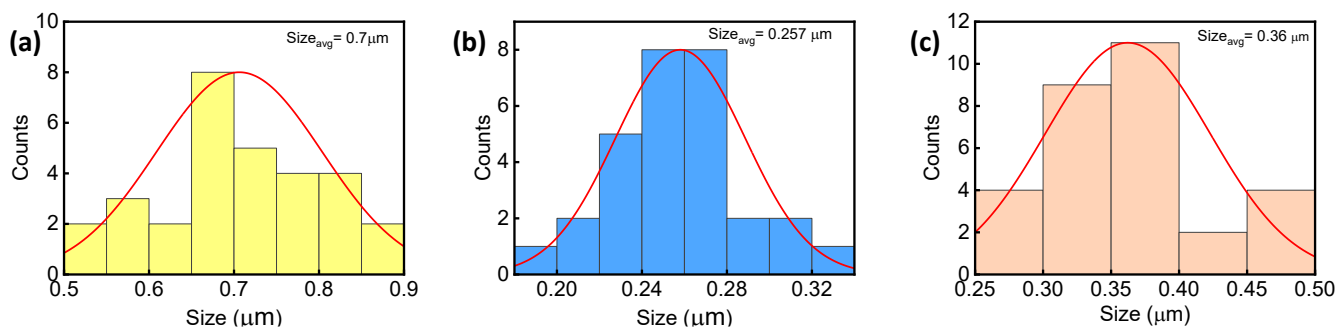

**Fig. S3.** Particle size distribution of (a) CS (b) Ag@CS and (c) Ag@CS/Se.

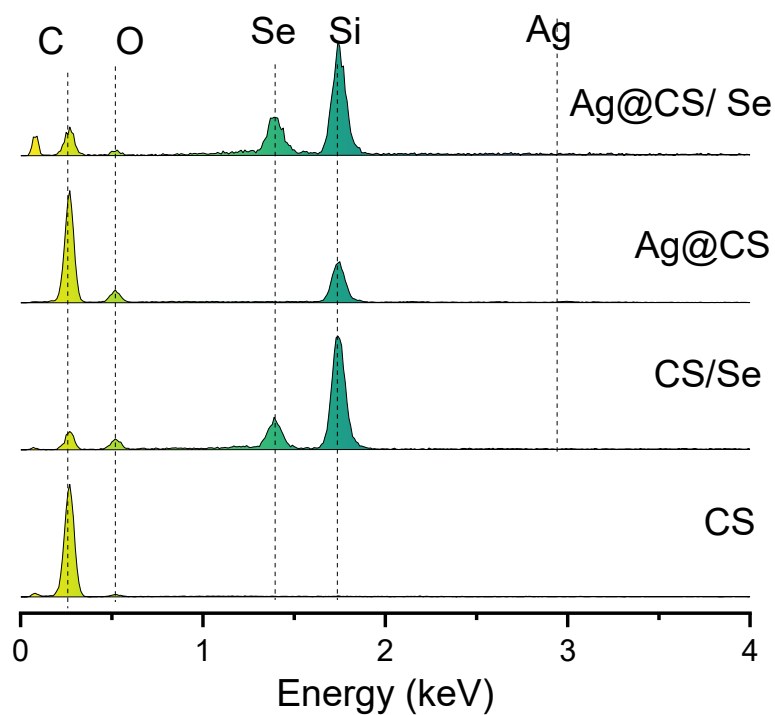

| Wt%/At%  | C     | O     | Ag       | Se   |
|----------|-------|-------|----------|------|
| CS       | 96/97 | 4/3   | -        | -    |
| CS/Se    | 53/70 | 27/26 | -        | 20/4 |
| Ag@CS    | 77/82 | 22/17 | 1.0/0.12 | -    |
| Ag@CS/Se | 59/84 | 8/9   | 2/0.3    | 31/6 |

**Fig S4.** EDX spectra of the various cathode candidates and a table showing their composition in Wt% and At%.

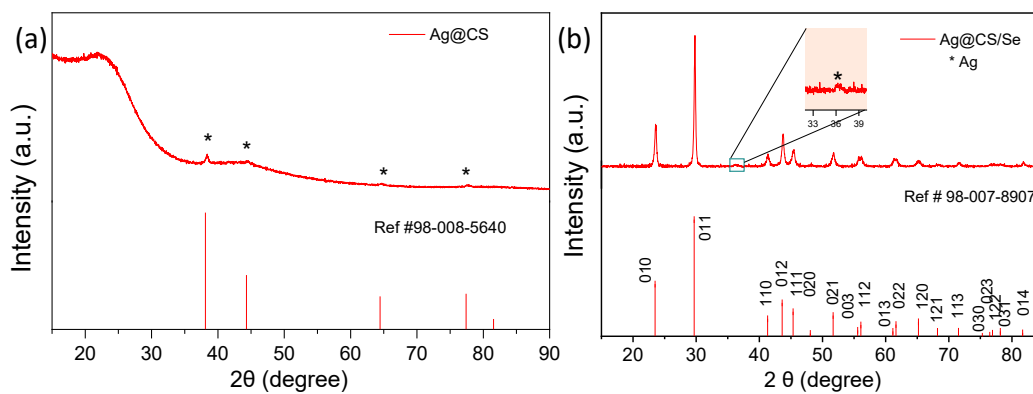

**Fig S5.** XRD pattern of the silver centred carbon composite (a) before and (b) after selenium incorporation.

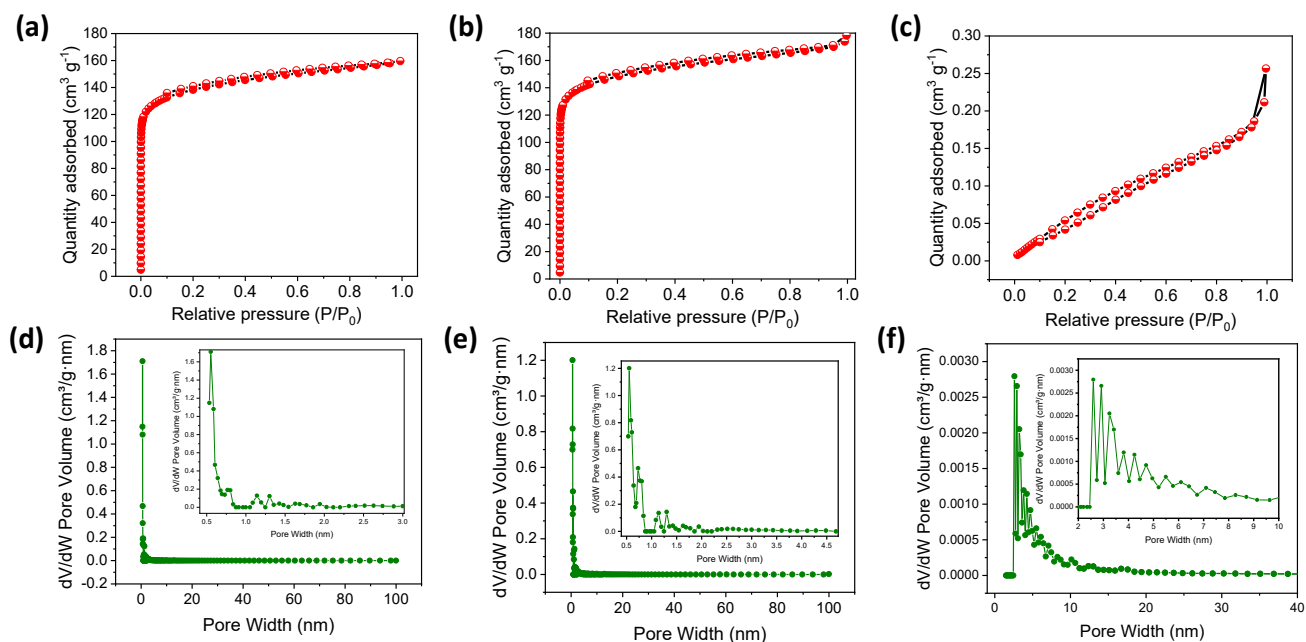

**Fig. S6.** Nitrogen adsorption/desorption isotherms of (a) CS, (b) Ag@CS and (c) Ag@CS/Se. Pore size distribution plot of (d) CS, (e) Ag@CS and (f) Ag@CS/Se.

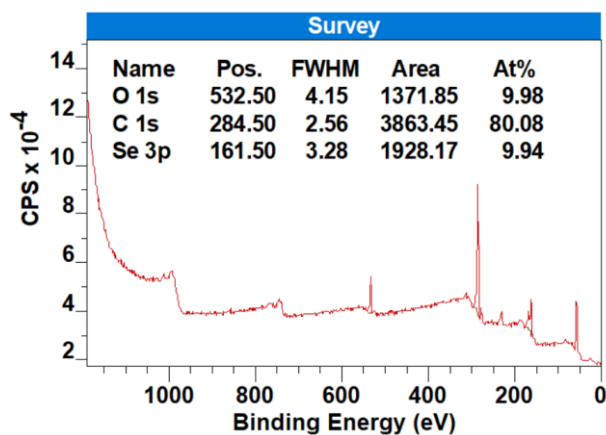

Fig S7. Survey spectrum of Ag@CS/Se.

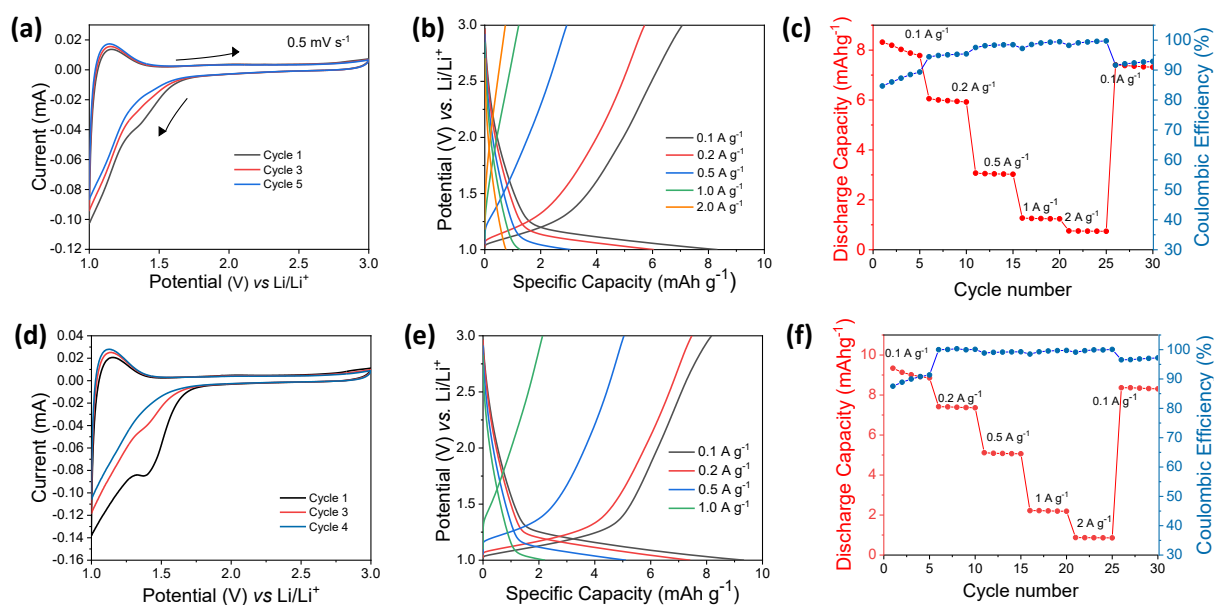

Fig. S8. (a) CVs recorded at  $0.5 \text{ mV s}^{-1}$  scan rate, (b) galvanostatic cycling profiles obtained at varying current densities and (c) rate capability plot of CS electrode. (d) CVs recorded at  $0.5 \text{ mV s}^{-1}$  scan rate, (e) galvanostatic cycling profiles obtained at varying current densities and (f) rate capability plot of CS@Ag electrode.

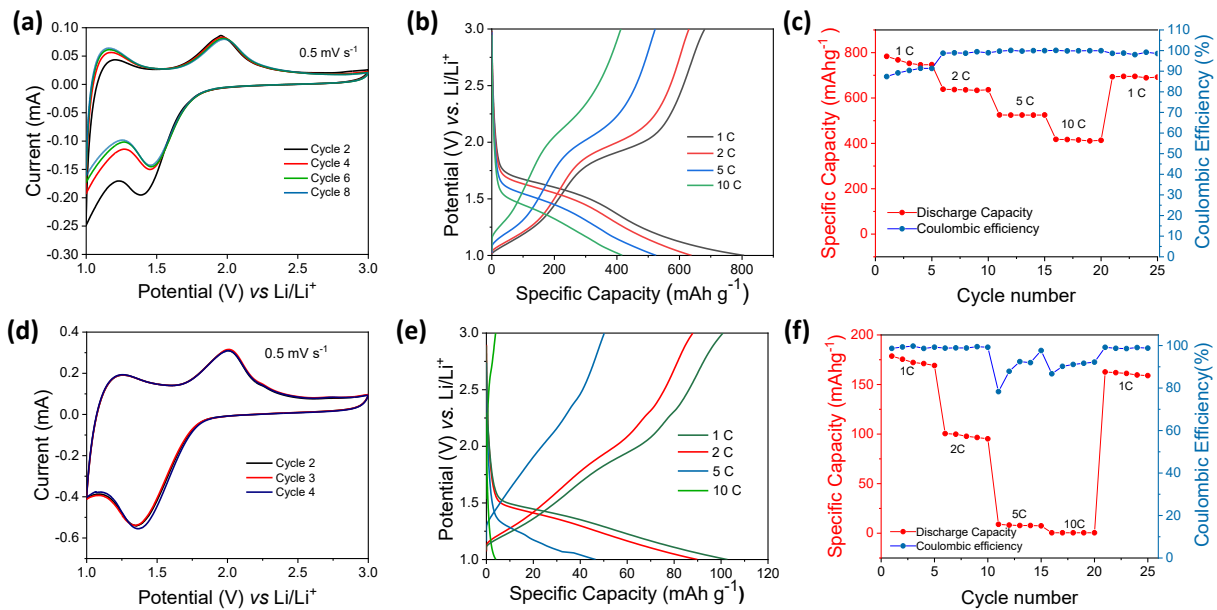

**Fig. S9.** (a,d) CVs recorded at  $0.5 \text{ mV s}^{-1}$ , (b,e) galvanostatic cycling profiles obtained at varying C-rates and (c,f) rate capability plot of Li-Se cells with CS@Ag as host with 10% and 40% selenium loading, respectively.

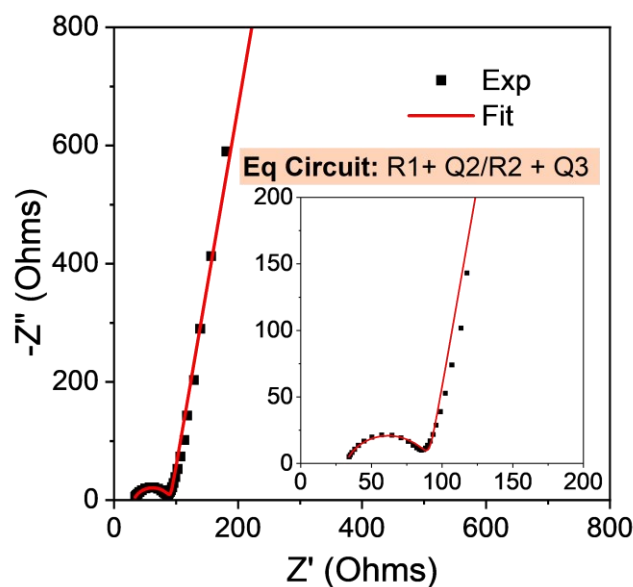

**Fig. S10.** Nyquist plot of Li-Se cell with silver catalyst centre before cycling.

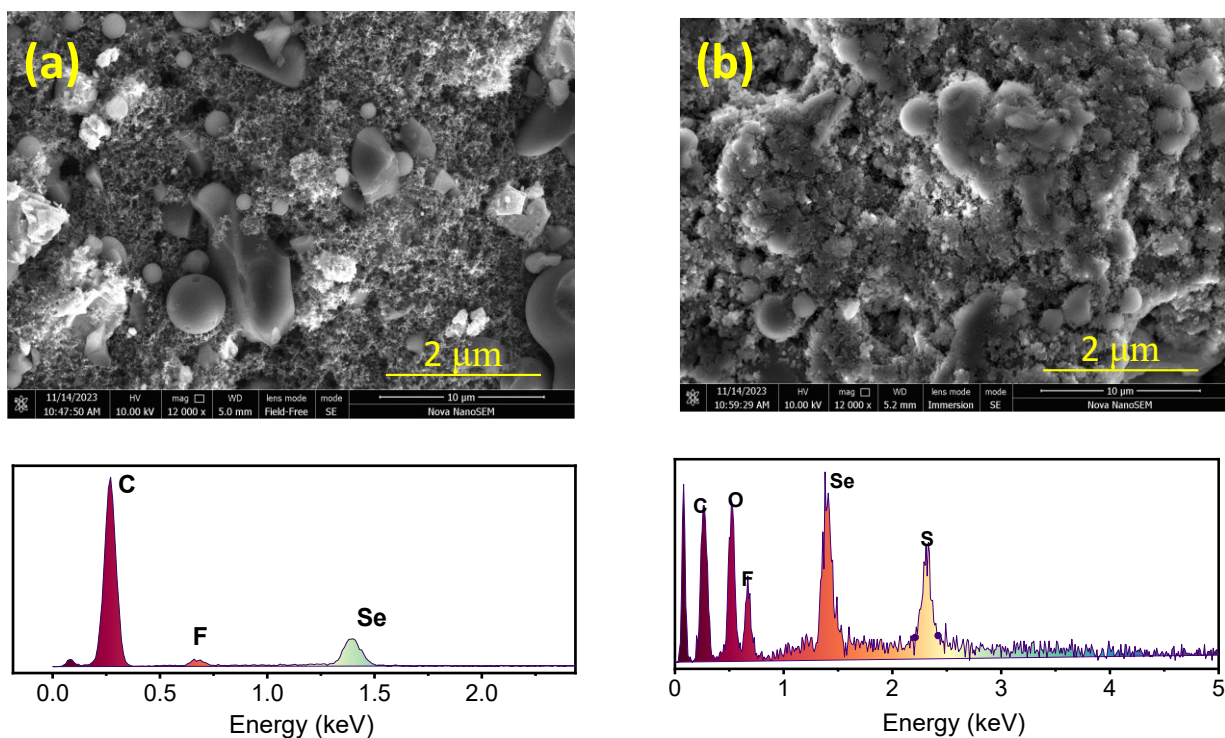

**Fig. S11.** SEM and EDX of Ag@CS/Se cathode (a) before and (b) after cycling.

**Table S1.** Comparison of the electrochemical performance of Se-based composite cathode presented in this work with those reported in the literature.

| Sl No | Year | Cathode             | Catalyst/Modification strategy | Method of preparation              | Electrolyte                                                           | Capacity @1C in mAh g <sup>-1</sup> | Long cycling                                               | Ref |
|-------|------|---------------------|--------------------------------|------------------------------------|-----------------------------------------------------------------------|-------------------------------------|------------------------------------------------------------|-----|
| 1     | 2013 | Se@C                | Mesoporous carbon              | Melt-diffusion                     | 1 M LiPF <sub>6</sub> in EC and DEC (1:1 v/v)<br>1 M LiTFSI in TEGDME | 350                                 | 0.25 C- 1000 cycles- 480 mAh.g <sup>-1</sup>               | 20  |
| 2     | 2014 | Se-CDC              | Ordered micro/mesoporous CDC   | Melt diffusion                     | 1 M LiTFSI in DME and DOL (1:1 v/v) 0.2M LiNO <sub>3</sub>            | 400                                 | 0.2C- 150 cycles- 500mAh.g <sup>-1</sup>                   | 50  |
| 3     | 2014 | Se@C                | PTCDA                          | Thermal treatment                  | 1 M LiPF <sub>6</sub> in EC and DEC)                                  | NA                                  | 100mA.g <sup>-1</sup> - 250 cycles- 430mAh.g <sup>-1</sup> | 61  |
| 4     | 2014 | Se/MCM              | Mesoporous carbon              | Spray drying hard templateapproach | 1 M LiTFSI in DME and DOL (1:1 v/v)                                   | NA                                  | 0.5 C- 100 cycles- 300mAh.g <sup>-1</sup>                  | 62  |
| 5     | 2015 | Se/TiO <sub>2</sub> | Titanium oxide added           | Melt-diffusion                     | DOL                                                                   | 350                                 | 2 C- 400 cycles- 230mAh.g <sup>-1</sup>                    | 63  |

|    |      |                                         |                                                       |                                                            |                                                                                                                  |     |                                                                                               |    |
|----|------|-----------------------------------------|-------------------------------------------------------|------------------------------------------------------------|------------------------------------------------------------------------------------------------------------------|-----|-----------------------------------------------------------------------------------------------|----|
| 6  | 2016 | Se@NC@C                                 | Se, LiEt <sub>3</sub> BH, PAN                         | Solution processing, thermal treatment, CVD                | 2.4 M LiTFSI in DOL and DME                                                                                      | 250 | 0.5 C- 100 cycles- 310mAh.g <sup>-1</sup>                                                     | 64 |
| 7  | 2016 | Se@C                                    | SeO <sub>2</sub> , Sucrose                            | Microwave-heating                                          | 1 M LiTFSI in DOL and DMEc                                                                                       | NA  | 0.1 C- 100 cycles- 300mAh.g <sup>-1</sup>                                                     | 65 |
| 8  | 2016 | Se/CNTs                                 | CNT incorporation                                     | Pressure enhanced melt-diffusion                           | 1 M LiPF <sub>6</sub> in EC and DMC                                                                              | 200 | 0.1 C- 100 cycles- 353mAh.g <sup>-1</sup>                                                     | 66 |
| 9  | 2016 | Graphene -Se hybrid microballs          | Graphene selenium hybrid microball architecture       | Spray drying                                               | 1 M LiTFSI in a mixture of tetraethylene glycol dimethyl ether and 1,3-dioxolane mixed in a volume ratio of 1:1. | 400 | 0.1 C- 100 cycles- 544mAh.g <sup>-1</sup>                                                     | 34 |
| 10 | 2017 | Se/N-MePCs                              | Se, tetrachloroethylene, cyanuric chloride            | Solution processing, thermal treatment, melt-diffusion     | 1 M LiTFSI in DOL and DME                                                                                        | 301 | 1 C- 500 cycles- 301mAh.g <sup>-1</sup>                                                       | 67 |
| 11 | 2018 | Se/N-MePCs @AgS                         | phenol, melamine, formaldehyde, AgNO <sub>3</sub>     | Solution processing, thermal treatment, melt-diffusion     | 1 M LiTFSI in DOL and DMEc                                                                                       | 193 | 0.5 C- 400 cycles- 206 mAh.g <sup>-1</sup><br>1 C- 400 cycles- 193 mAh.g <sup>-1</sup>        | 68 |
| 12 | 2020 | Se-CMK-3                                | selenium-infused ordered mesoporous carbon composites | Melt-diffusion from a ball- milled mixture of Se and CMK-3 |                                                                                                                  | NA  | 0.05 C- 100 cycles- 488.7 mAh.g <sup>-1</sup><br>0.5 C- 500 cycles- 268.7 mAh.g <sup>-1</sup> | 69 |
| 13 | 2021 | Se <sub>1-x</sub> S <sub>x</sub> @NC PC | Nitrogen-doped carbon photonic crystal (NCPC)         | NCPC-hard template method                                  | 1 M LiTFSI + 1 wt % LiNO <sub>3</sub> in DME and DOL (1:1 v/v)                                                   | NA  | 0.1 A g- 200 cycles- 240 mAh.g <sup>-1</sup>                                                  | 70 |
| 14 | 2022 | C/Se                                    | Carbon host                                           |                                                            | 1M LiPF <sub>6</sub> in EC:DEC (1:1 v/v)                                                                         | 400 | 1 C- 500 cycles- 400 mAh.g <sup>-1</sup>                                                      | 71 |
| 15 | 2022 | 3DC/Se                                  | Carbon host                                           | Melt diffusion                                             | 1M LiPF <sub>6</sub> in EC:DEC (1:1 v/v)                                                                         | 300 | 0.2 C- 50 cycles- 400 mAh.g <sup>-1</sup>                                                     | 72 |



|    |      |                                       |                                                                      |                                      |                                                                            |         |                                             |                 |
|----|------|---------------------------------------|----------------------------------------------------------------------|--------------------------------------|----------------------------------------------------------------------------|---------|---------------------------------------------|-----------------|
| 16 | 2022 | Se@ ZIF-8-C@MWCNT                     | ZIF-8-C@MWCNT                                                        | Melt-diffusion                       | 1 M LiTFSI in DME and DOL (1:1 v/v) 1% LiNO <sub>3</sub>                   | 450-500 | 1 C- 500 cycles- 300-250mAh.g <sup>-1</sup> | 33              |
| 17 | 2023 | PM-CNF/Se                             | carbon nanofiber membrane (PM-CNF)                                   | Electrospinning                      | ether/carbonate-based                                                      |         | 5 C- 1750 cycles- 404.2 mAh.g <sup>-1</sup> | 73              |
| 18 | 2023 | Se <sub>68</sub> -S <sub>9</sub> /rGO | Nanofabrication of Se/rGO with S doping via solution co-impregnation | Solution co-impregnation             | ACN and LiTFSI + 1,1,2,2- tetrafluoroethyl2, 2,3,3- tetrafluoropropylether | 579     | 1C- 200 cycles- 600 mAh.g <sup>-1</sup>     | 74              |
| 19 | 2023 | Co-NC/Se                              | Cobalt doping                                                        | Melt diffusion                       | 1 M LiPF <sub>6</sub> in EC:DEC (1:1v/v) with 5% FEC                       | 480     |                                             | 75              |
| 20 | 2023 | WSe <sub>2</sub> /WO <sub>2</sub> @Se | long WO <sub>2</sub> nanorods and WSe <sub>2</sub> nanosheets        | Melt diffusion                       | 1 M LiTFSI in DME and DOL (1:1 v/v) 1% LiNO <sub>3</sub>                   | 600     | 1C- 100 cycles- 200 mAh.g <sup>-1</sup>     | 76              |
| 21 | 2023 | HPC@Se                                | 3D honeycomb porous carbon                                           | Melt diffusion                       | 1 M LiPF <sub>6</sub> in EC and DEC                                        | 500     | 0.2 C- 200 cycles- 561 mAh.g <sup>-1</sup>  | 49              |
| 22 | 2023 | Ag@CS/Se                              | Silver centred carbon spheres                                        | Microwave reactor and melt diffusion | 1 M LiTFSI in DOL/DME (in1:1 v/v)                                          | 249     | 1C-1000 cycles 249 mAh g <sup>-1</sup>      | <b>Our work</b> |
